# Prognostic role of high B7-H4 expression in patients with solid tumors: a meta-analysis

Xing Song<sup>1,\*</sup>, Yingjie Shao<sup>1,\*</sup>, Wendong Gu<sup>1</sup>, Chao Xu<sup>2</sup>, Huihui Mao<sup>2</sup>, Honglei Pei<sup>1</sup>, Jingting Jiang<sup>3</sup>

<sup>1</sup>Department of Radiation Oncology, The Third Affiliated Hospital of Soochow University, Changzhou 213003, People's Republic of China

<sup>2</sup>Department of Laboratory, The Third Affiliated Hospital of Soochow University, Changzhou 213003, People's Republic of China

<sup>3</sup>Department of Tumor Biological Treatment, The Third Affiliated Hospital of Soochow University, Changzhou 213003, People's Republic of China

\*These authors have contributed equally to this work

Correspondence to: Honglei Pei, email: hongleipei@126.com  
Jingting Jiang, email: jiangjingting@suda.edu.cn

Keywords: B7-H4, prognosis, solid tumor, biomarker, meta-analysis

Received: December 30, 2015

Accepted: March 28, 2016

Published: April 05, 2016

## ABSTRACT

**Background:** Recently, many studies have shown that B7-H4 exhibits altered expression in various cancers. We performed a meta-analysis to evaluate the prognostic role of B7-H4 expression in solid tumors.

**Results:** Data from 18 observational studies and 2467 patients were summarized. An elevated baseline B7-H4 was significantly associated with worse OS (pooled HR = 1.79; 95% CI = 1.56–2.06). Differences across subgroups of tumor type, patients' ethnicity, analysis type, HR obtain method and cut-off value were not significant ( $P_D = 0.313$ ,  $P_D = 0.716$ ,  $P_D = 0.896$ ,  $P_D = 0.290$  and  $P_D = 0.153$ , respectively). Furthermore, patients with high B7-H4 had a significantly shorter DFS (pooled HR = 2.12; 95%CI = 1.45–3.09).

**Materials and Methods:** We searched PubMed, Embase and the Cochrane Library (last update by November 26, 2015) to identify studies assessing the effect of B7-H4 on survival of cancer patients. Pooled hazard ratios (HRs) for overall survival (OS) and disease-free survival (DFS) were estimated using fixed-effects models and random-effects models respectively.

**Conclusions:** This meta-analysis clarified that high B7-H4 expression in tissue was significantly associated with poor survival in patients with solid tumors. Future clinical studies are warranted to determine whether B7-H4 blockade has a favorable effect on disease recurrence and mortality.

## INTRODUCTION

Cancer is a leading cause of mortality in the world, and has been a major public health challenge. Based on the GLOBOCAN 2012 estimates, there were approximately 14.1 million new cancer cases and 8.2 million cancer-related deaths in worldwide [1]. Besides early diagnosis, correct therapy strategies based on the prediction of patients' outcome also contributes to successful treatment of cancer. Therefore, it is of great significance for us to identify newer tumor biomarkers with improved sensitivity and specificity to determine the optimal

therapeutic strategies and predict the prognosis of cancers. Recently, the costimulatory molecule B7-H4 seems to be a new prognostic marker for cancer.

B7-H4, also known as B7x or B7S1 with the official gene name VCN1 (V-set domain containing T cell activation inhibitor 1) is a member of the B7-family. Proteins in this family are present on the surface of antigen-presenting cells and interact with ligands bound to receptors on the surface of T cells [2]. B7-H4 is a transmembrane protein and belongs to the same family as the inhibitory checkpoint molecule PD-L1. Since a few years, inhibitory checkpoint molecules

have been increasingly considered as new targets for cancer immunotherapies. Currently there are more than 6 antibodies against PD-L1 or its ligand PD-1 in late stage clinical trials and two drugs are already approved and in clinical use for lung cancer and melanoma [3].

Compared with PD-L1, the expression of B7-H4 in human cancers is more extensive [4]. Several recent studies have shown that B7-H4 is frequently overexpressed in malignant tumors, including cancers of ovary [5], breast [6], and lung [7]. The expression of B7-H4 in the tumor microenvironment can inhibit the proliferation and activity of T cells, and down-regulate the secretion of immune cytokines such as IL-2 [8, 9]. Knockdown of B7-H4 mRNA and protein expression in the SKBR3 breast cancer cell line enhanced intracellular caspase activity, leading to acceleration of tumor cell apoptosis [10]. Therefore, B7-H4 plays an important role in inducing immunosuppressive effects and may serve as a new target for cancer immunotherapy.

The findings of several clinical studies have suggested that high B7-H4 expression is associated with shorter overall survival (OS) and disease-free survival (DFS) in various types of cancer [11-13]. Nevertheless, the reliability and degree of the prognostic impact of B7-H4 in solid tumors has not yet been methodically analyzed. Therefore, we conducted a systematic review and meta-analysis to assess the prognostic effect of elevated B7-H4 in solid tumors. We hypothesized that high B7-H4 expression represents a biomarker of poor survival in patients with solid tumors.

## RESULTS

### Study characteristics

Using the described searching strategy, 216 references were initially retrieved. After screening the titles, abstracts, publication types and full text of each publication, 34 articles investigated the correlation between B7-H4 expression and patient survival or disease recurrence in various malignant tumors were selected for the systemic review (Table 1). Among these, 16 articles were excluded (seven lacked some important data, six detected B7-H4 not in tissue sample, three investigated the same patient cohorts with others). Finally, 18 studies were enrolled into the meta-analysis (Figure 1) [11-28]. Table 1 shows the main characteristics of the included studies. A total of 2467 patients from China, Japan, Korea, Italy, America, Germany and Greece were diagnosed with a variety of cancers, including esophageal cancer, gastric cancer, colorectal cancer, melanoma, cervical cancer, non-small cell lung cancer, osteosarcoma, ovarian cancer, pancreatic cancer, prostate cancer, thyroid cancer, urothelial cell cancer and so on. Eleven studies (61%) were published in 2013 or later. Fourteen studies (78%) reported on Asians, and 4 studies (26%) on Caucasians.

The endpoints OS and DFS were addressed in 16 and 5 studies, respectively. HRs were reported directly in 9 studies and estimated indirectly in the other 9 studies. The cut-off values were different in these studies.

### Quality assessment

Each of the 18 eligible studies included in our meta-analysis was assessed for quality according to the Newcastle-Ottawa Quality Assessment Scale (NOS). The quality of all studies included varied from 4 to 9, with a mean of 6.3. A higher value indicated better methodology. Therefore, all studies were included in the subsequent analysis.

### Overall survival

Sixteen studies, including 1542 patients, provided suitable data for OS analysis. The main results of this meta-analysis are listed in Table 2. As the studies evaluating OS were not of obvious statistical heterogeneity ( $I^2 = 0.0\%$ ,  $P = 0.481$ ), we used a fixed-effects model to pool the HRs. Overall, the pooled analysis demonstrated that a high B7-H4 was statistically significant associated with worse OS (pooled HR = 1.79; 95% CI = 1.56–2.06;  $P < 0.001$ ). A forest plot of study-specific HRs for OS is presented in Figure 2.

Pooled HRs for OS according to different cancer sites are shown in Figure 3. The negative effect of elevated B7-H4 on OS was demonstrated in patients with esophageal squamous cell cancer (pooled HR = 1.96; 95% CI = 1.28–3.02;  $P = 0.002$ ), gastric cancer (pooled HR = 1.74; 95% CI = 1.36–2.21;  $P < 0.001$ ), pancreatic cancer (pooled HR = 2.40; 95% CI = 1.37–4.21;  $P = 0.002$ ) and other cancers (pooled HR = 1.73; 95% CI = 1.41–2.11;  $P < 0.001$ ). Differences between tumor type subgroups were not statistically significant ( $P_D$  for subgroup difference = 0.313). B7-H4 was significantly associated with worse OS in Asian patients (pooled HR = 1.81; 95% CI = 1.55–2.12;  $P < 0.001$ ) and Caucasian patients (pooled HR = 1.70; 95% CI = 1.24–2.33;  $P = 0.011$ ). Differences across subgroups of patients' ethnicity were not statistically significant ( $P_D = 0.716$ ). Also, differences across subgroups of analysis type, HR obtain method and cut-off value were of no significance ( $P_D = 0.896$ ,  $P_D = 0.290$  and  $P_D = 0.153$ , respectively). For OS, statistically significant pooled HR values  $>1$  were consistently calculated in subgroup meta-analyses stratified by patients' ethnicity, tumor type, analysis type, HR obtain method and cut-off value (Table 2).

Sensitivity analysis was performed by sequential omission of individual studies using the fixed-effects model, and the result pattern was not obviously impacted by any single study (Figure 4). We also conducted a meta-regression to explore the potential factors responsible for the heterogeneity. The results showed no statistically significant impact of ethnicity ( $P = 0.998$ ), tumor type

**Table 1: Main characteristics of all studies included in the meta-analysis**

| First author [References] | Year | Country | Cancer       | Case number | Tumor stage (I/II/III/IV)   | Follow-up (months) | Highexpression n (%) | Detected method | Cut-off value         | Multivariate analysis | HRs provided from | Outcome measures |
|---------------------------|------|---------|--------------|-------------|-----------------------------|--------------------|----------------------|-----------------|-----------------------|-----------------------|-------------------|------------------|
| LIU [11]                  | 2014 | Japan   | Cervical     | 102         | 73/29(I-IIA/IIIB-TV)        | 4.8-169            | 71(69.6%)            | IHC             | NR                    | yes                   | Report            | OS/DFS           |
| Liang [12]                | 2014 | China   | Colorectal   | 185         | 66/119(I-II/III-IV)         | Over60             | 117(63.2%)           | IHC             | IRS $\geq$ 4          | yes                   | Report            | OS/DFS           |
| Chen [16]                 | 2011 | China   | ESC          | 112         | 13/63/20/16                 | Longest 111        | 66(58.9%)            | IHC             | H-score >160          | yes                   | Report            | OS               |
| Wang [27]                 | 2015 | China   | ESC          | 66          | 43/23(I-II/III-IV)          | Over60             | 48(72.7%)            | IHC             | IRS $\geq$ 4          | no                    | SC                | OS               |
| Arigami [15]              | 2011 | Japan   | Gastric      | 120         | 62/58(I-II/III-IV)          | Median 40          | 31(25.8%)            | IHC             | Moderate staining     | yes                   | Report            | OS               |
| Jiang [13]                | 2010 | China   | Gastric      | 156         | 14/22/102/18                | Over60             | 70(44.9%)            | IHC             | IRS $\geq$ 9          | yes                   | SC                | OS/DFS           |
| Geng [26]                 | 2015 | China   | Gastric      | 100         | 40/60(I-II/III-IV)          | Over60             | 71(71%)              | IHC             | IRS $\geq$ 3          | yes                   | Report            | OS               |
| Maskey [24]               | 2014 | China   | Gastric      | 56          | 12/44(I-II/III-IV)          | 12-52              | 12(21.4%)            | IHC             | IRS $\geq$ 9          | no                    | SC                | OS               |
| Quandt [18]               | 2011 | Germany | Melanoma     | 29          | 26/3(III/IV)                | Over60             | 21(72.4%)            | IHC             | IRS $\geq$ 9          | no                    | SC                | OS               |
| Li [19]                   | 2013 | China   | NSCLC        | 49          | 13/29/7(I/II/III)           | Over60             | 20(40.8%)            | IHC             | IRS $\geq$ 9          | yes                   | SC                | OS               |
| Dong [25]                 | 2015 | China   | Osteosarcoma | 104         | 62/42(I-II/III)             | Over60             | 73(70.19%)           | IHC             | IRS $\geq$ 4          | yes                   | Report            | OS               |
| Simon [14]                | 2007 | Italy   | Ovarian      | 233         | NR                          | Over60             | 141(60.5%)           | ELISA           | protein > 426 pg/mg   | no                    | SC                | OS               |
| Chen [22]                 | 2014 | China   | Pancreatic   | 63          | NR                          | 1-33               | 31(49.2%)            | IHC             | >30% of cells stained | no                    | SC                | OS               |
| Tsiaousidou [20]          | 2013 | Greece  | Pancreatic   | 41          | 4/35/2(I/II/III)            | 2-31               | 16(39.0%)            | IHC             | >10% of cells stained | yes                   | Report            | OS               |
| Zang [28]                 | 2007 | America | Prostate     | 823         | NR                          | Median 84          | 120(15%)             | IHC             | IRS $\geq$ 3          | no                    | Report            | DFS              |
| Zhu [21]                  | 2013 | China   | Thyroid      | 64          | 30/34(I/II,III,IV)          | 1-50               | 46(71.9%)            | IHC             | IRS >6                | no                    | SC                | OS               |
| Fan [23]                  | 2014 | China   | UCC          | 62          | 11/51(Superficial/Invasive) | Over60             | 47(75.8%)            | IHC             | IRS $\geq$ 4          | yes                   | Report            | OS               |
| Jung [17]                 | 2011 | Korea   | RCC          | 102         | NR                          | 6-84               | 18(17.6%)            | IHC             | >10% of cells stained | yes                   | SC                | DFS              |

ESC: esophageal squamous cell; NSCLC = non-small cell lung cancer; UCC: urothelial cell cancer; RCC: renal cell cancer; ELISA: enzyme-linked immunoabsorbent assay; IHC: immunohistochemistry; OS = overall survival; DFS = disease-free survival; NR: not report; SC: survival curve; IRS: immunoreactivity score.

( $P = 0.920$ ), analysis type ( $P = 0.998$ ), HR obtain method ( $P = 0.621$ ) and cut-off value ( $P = 1.000$ ) on the combined effect size for OS.

The publication bias of all enrolled studies was evaluated using funnel plots, and Egger's and Begg's tests. Visual inspection of the funnel plot (Figure 5) revealed evidence of publication bias, which was confirmed by Egger's tests ( $P < 0.001$ ). Using the "Trim and Fill" method to adjust for publication bias under the random-effects model, the corrected pooled multivariable-adjusted HR for OS was 1.65 (95% CI = 1.44–1.88).

### Disease-free survival

Five studies, comprising a total of 1368 patients, provided suitable data for DFS analysis. Because the

five studies that reported DFS were of obvious statistical heterogeneity ( $I^2 = 56.9\%$ ;  $P = 0.055$ ) (Table 3), they were analyzed via a random-effects model and the pooled HR revealed a significant positive association between high level of B7-H4 and poor DFS (pooled HR = 2.12; 95%CI = 1.45–3.09;  $P < 0.001$ ) (Table 3; Figure 6). All the HRs and corresponding 95% CIs are shown in Table 3. A forest plot of study-specific HRs for DFS is presented in Figure 3. Subgroup analysis by cancer site revealed the highest adverse effect of elevated B7-H4 on DFS in patients with renal cell carcinoma (pooled HR = 5.99; 95% CI = 2.24–16.04;  $P < 0.001$ ) (Table 3). A separate meta-analysis of 4 studies (comprising 545 patients) based on Asian patients computed a pooled HR for DFS of 2.44 (95% CI = 1.64–3.65;  $P < 0.001$ ) with moderate heterogeneity among studies ( $I^2 = 39.8\%$ ;  $P = 0.173$ ).

## DISCUSSION

The costimulatory molecule B7-H4 is a member of the inhibitory B7 family. High B7-H4 expression has been reported to be involved in tumor immune escape [29]. The functions of B7-H4 in immune escape are achieved mainly through the following three ways: (1) B7-H4-Ig fusion protein could activate regulatory T cells (Tregs), and then inhibit the proliferation and cytokine production of CD4<sup>+</sup> and CD8<sup>+</sup> T cells [30]; (2) B7-H4 could reduce the T-cell-stimulating capacity of macrophages, and then suppress tumor-associated antigen-specific T-cell immunity [31]; (3) B7-H4 could arrest cell cycle progression of cytotoxic T lymphocytes (CTLs) in G0/G1 phase [32]. Therefore, the overexpression of B7-H4 in the tumor microenvironment plays an important role in promoting tumor progression and metastasis.

PD-L1, another important inhibitory checkpoint molecule of B7-family, has become a new target for current cancer immunotherapy [33]. PD-L1 can bind with PD-1, and produce inhibitory signals which can inhibit the cytotoxicity of CD8<sup>+</sup> tumor-infiltrating lymphocytes (TILs) [33]. Compared with B7-H4, PD-L1 has a very different expression pattern. PD-L1 is expressed on some normal tissues, whereas B7-H4 is

hardly detected in most non-tumor tissues [34]. PD-L1 is expressed in some human cancers, whereas B7-H4 is highly expressed in numerous types of human cancers, including melanoma [18], breast [6], non-small cell lung [7], ovary [35], kidney [36], prostate [28], esophagus [16], pancreas [37], and stomach cancer [13]. A new study indicated that B7-H1 expression was only correlated with tumor size, whereas B7-H4 expression was correlated with tumor size, lymph-node metastasis, and invasion depth in patients with pancreatic cancer [22]. Statistical analysis showed that high B7-H1 expression were not correlated with patients' overall survival time ( $P=0.089$ ), whereas high B7-H4 expression was correlated with poor survival in pancreatic cancer ( $P<0.001$ ) [22]. Therefore, compared with PD-L1, the expression of B7-H4 in human cancers has higher sensitivity and specificity [4]. These findings suggest that B7-H4 could be a new target for future cancer immunotherapy.

Our meta-analysis provides strong evidence that an elevated B7-H4 is an independent predictor of worse OS in patients with solid tumors. The subgroup analyses showed that the adverse prognostic effect of high B7-H4 remained substantial in different tumor type, as well as for patients of different ethnic backgrounds. Furthermore, this

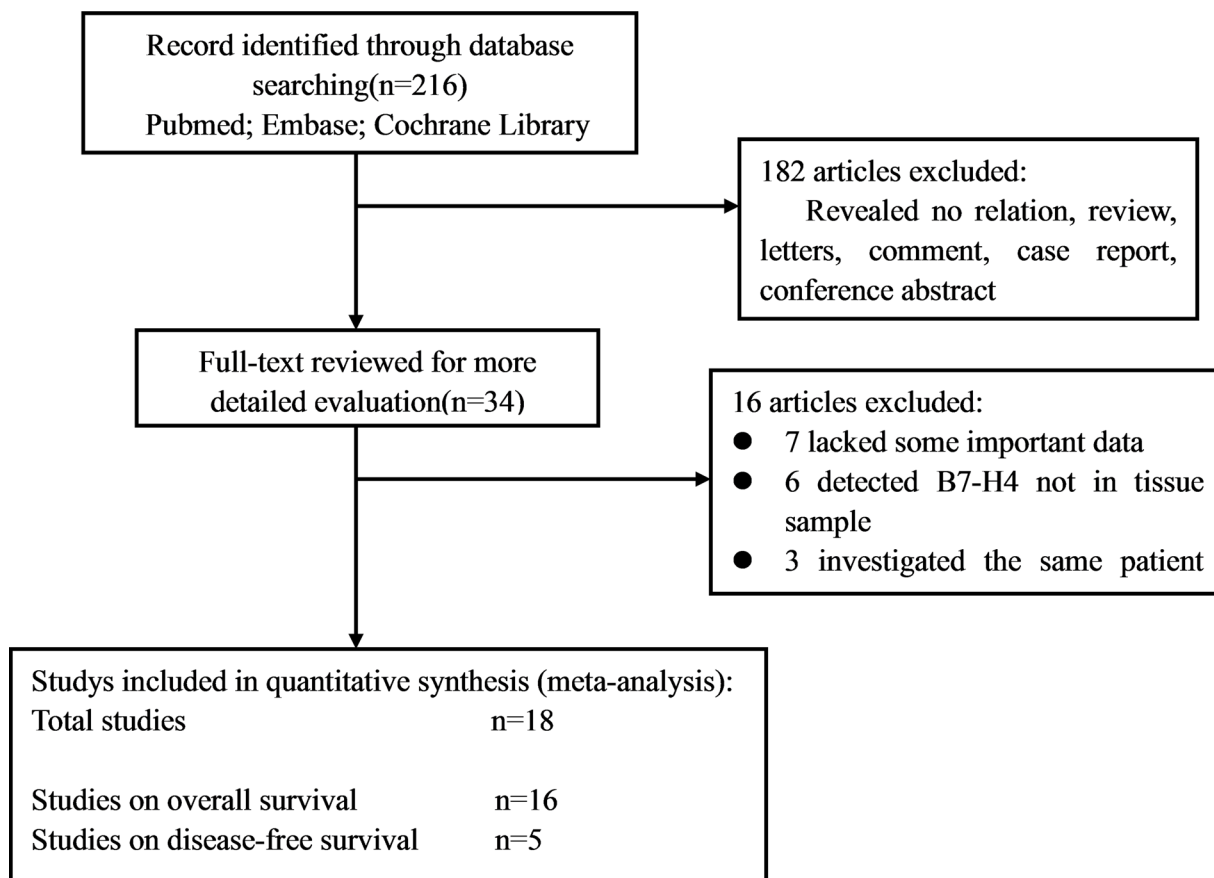

Figure 1: Flow diagram of the study selection process.

**Table 2: Pooled hazard ratios for OS according to subgroup analyses**

| Outcome subgroup  | No. of patients | No. of studies | Fixed-effects model |         |             | Heterogeneity |       |
|-------------------|-----------------|----------------|---------------------|---------|-------------|---------------|-------|
|                   |                 |                | HR (95% CI)         | P value | $P_D$ value | $I^2$ (%)     | P     |
| Overall survival  | 1542            | 16             | 1.79(1.56,2.06)     | <0.001  |             | 0             | 0.481 |
| Ethnicity         |                 |                |                     |         | 0.716       |               |       |
| Asian             | 1239            | 13             | 1.81(1.55,2.12)     | <0.001  |             | 0             | 0.560 |
| Caucasian         | 303             | 3              | 1.70(1.24,2.33)     | 0.001   |             | 47.7          | 0.148 |
| Tumor type        |                 |                |                     |         | 0.313       |               |       |
| ESC               | 178             | 2              | 1.96(1.28,3.02)     | 0.002   |             | 0             | 0.510 |
| Gastric           | 432             | 4              | 1.74(1.36,2.21)     | <0.001  |             | 0             | 0.490 |
| Pancreatic        | 104             | 2              | 2.40(1.37,4.21)     | 0.002   |             | 0             | 0.702 |
| others            | 828             | 8              | 1.73(1.41,2.11)     | <0.001  |             | 31.3          | 0.178 |
| Analysis type     |                 |                |                     |         | 0.896       |               |       |
| Multivariate      | 1031            | 10             | 1.78(1.51,2.09)     | <0.001  |             | 10.3          | 0.348 |
| Univariate        | 511             | 6              | 1.82(1.38,2.39)     | <0.001  |             | 0             | 0.481 |
| HR obtain method  |                 |                |                     |         | 0.290       |               |       |
| Reported in text  | 826             | 8              | 1.68(1.41,2.02)     | <0.001  |             | 11.0          | 0.344 |
| Data extrapolated | 716             | 8              | 1.97(1.57,2.46)     | <0.001  |             | 0             | 0.481 |
| Cut-off value     |                 |                |                     |         | 0.153       |               |       |
| IRS $\geq$ 4      | 417             | 4              | 1.70(1.31,2.21)     | <0.001  |             | 21.5          | 0.281 |
| IRS $\geq$ 9      | 290             | 4              | 2.45(1.73,3.46)     | <0.001  |             | 0             | 0.831 |
| others            | 835             | 8              | 1.67(1.39,2.02)     | <0.001  |             | 0             | 0.524 |

OS = overall survival; HR = hazard ratio; CI = confidence interval;  $P_D$  = P for subgroup difference; IRS: immunoreactivity score.

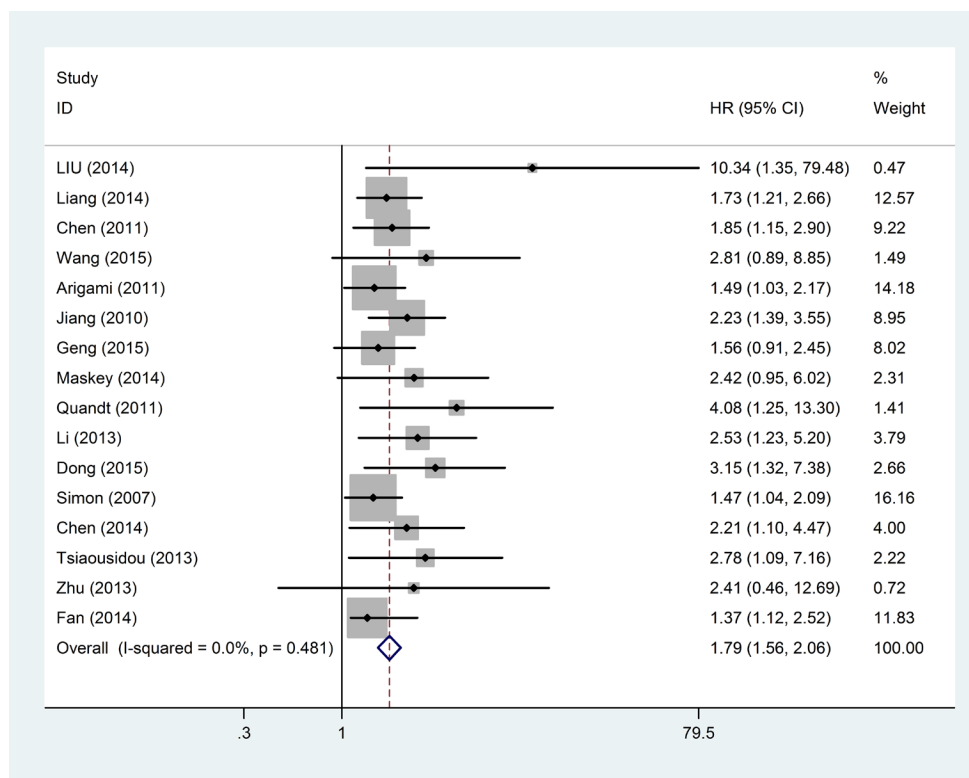

**Figure 2: Forest plots of studies evaluating hazard ratios of high B7-H4 expression in solid cancers for overall survival.**



meta-analysis suggests that cancer patients with elevated baseline B7-H4 have a significantly poorer DFS. In addition of B7-H4, B7-H4 mRNA may also be correlated with prognosis in patients with cancer. Although B7-H4 protein expression is absent in most somatic tissues, B7-H4 mRNA has been found to be widely expressed in human peripheral tissues and in most stromal and hematopoietic cells [29, 32, 38]. In tumor tissues, the protein levels of B7-H4 were positively correlated with their mRNA expression. By assessing the relative mRNA expression levels of B7-H4 in tumor tissues and the paired adjacent normal tissues with real-time PCR assay, researchers found that B7-H4 mRNA expression was confirmed in all of tumor specimens and B7-H4 mRNA expression level was higher in tumor tissues than adjacent normal tissues ( $P < 0.01$ ) [21, 27]. It was shown that B7-H4 mRNA expression level could also serve as a novel prognostic marker like B7-H4. However, few studies have actually confirmed the correlation between the B7-H4 mRNA and prognosis of cancer patients.

To our knowledge, this is the first meta-analysis providing robust evidence that elevated B7-H4 significantly correlates with worse OS and DFS in patients with solid tumors. However, some details need to be further refined. First, this study included only 18 eligible studies, which resulted in relatively insufficiency data in the subgroup analyses. Second, due to the lack of a unified cut-off value in B7-H4 expression, different

cut-off values were used in those studies. The inaccurate cut-off values may affect the availability of B7-H4 as a predictive biomarker in cancer prognosis. In view of this situation, a unified measuring method and cut-off value need to be established. Results of the 18 studies enrolled, 17 measured B7-H4 by immunohistochemistry (IHC), only 1 used enzyme-linked immune absorbent assay (ELISA). Compared with other measuring methods, IHC is more economic and easier to be spread. Thus it can be seen that IHC might be the most common method to measure the B7-H4 expression in the future. Because we found that differences across subgroup of cut-off value were not significant, further studies with larger sample size are still needed to identify the most appropriate cut-off value. Third, several HRs were calculated from the data extracted from the survival curves, which inevitably brought about small statistical errors. Fourth, under common settings, univariate analyses may overestimate effect sizes compared to multivariate analyses. However, univariate analyses based on unadjusted HRs did not show a notable difference in the pooled estimate compared to the multivariate analyses in our study. Finally, funnel plot graphics indicated publication bias. However, we found the corrected pooled effect size remained statistically significant after using the “Trim and Fill” method to adjust the publication bias, and thereby confirming the reliability of our results.

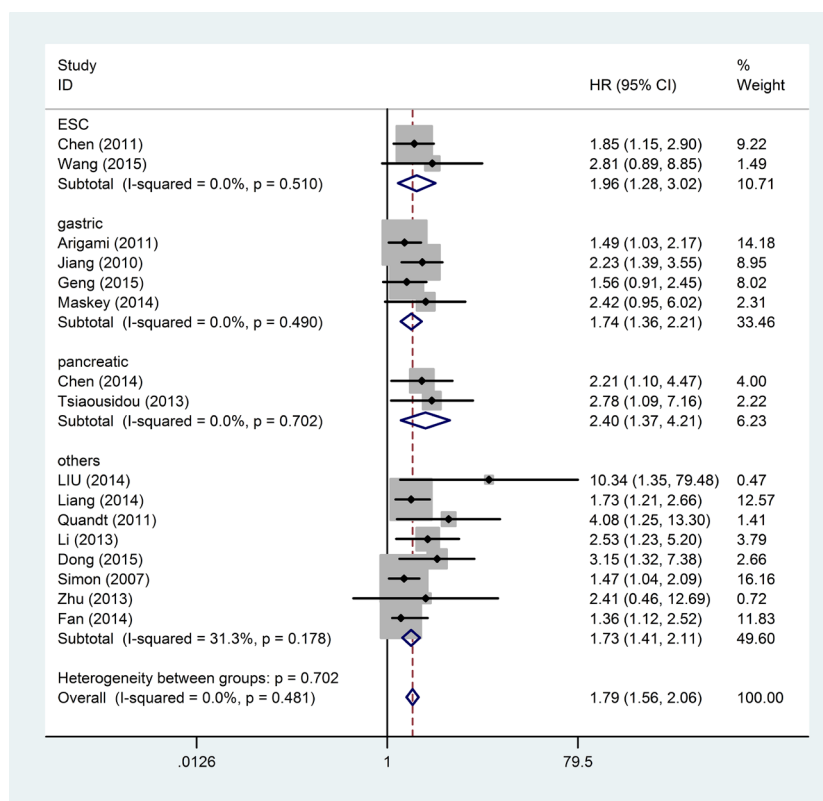

**Figure 3: Forest plot of the relationship between high B7-H4 expression and overall survival in patients with a variety of cancers.**

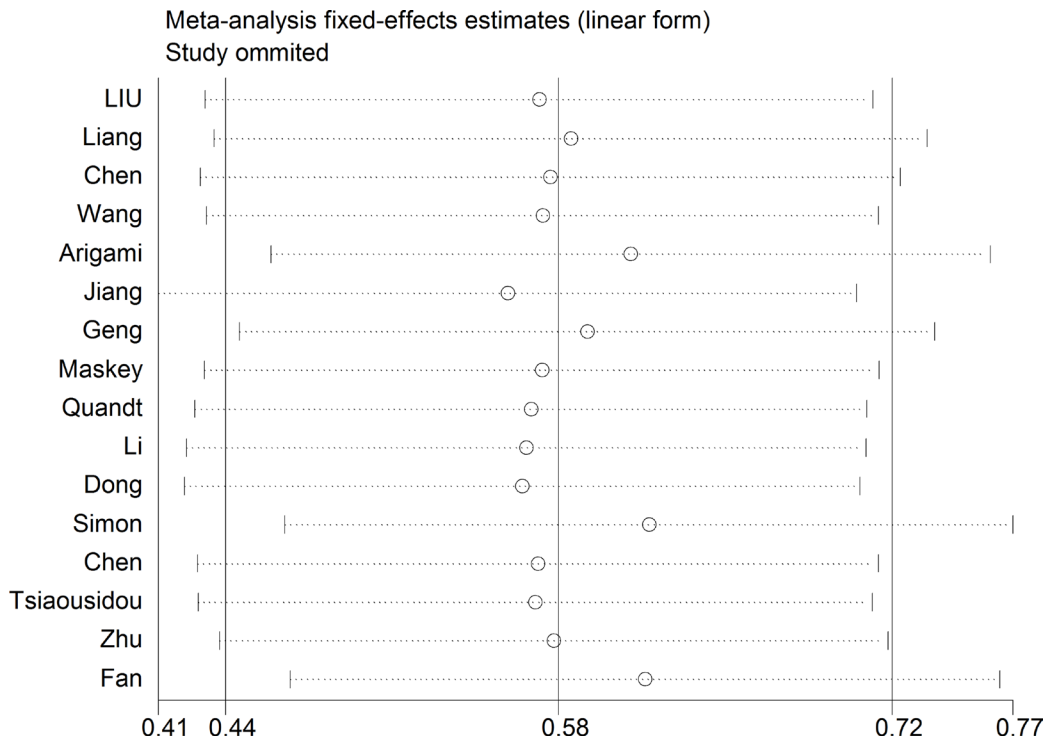

Figure 4: Sensitivity analysis on the relationships between B7-H4 expression and overall survival in solid cancer patients.

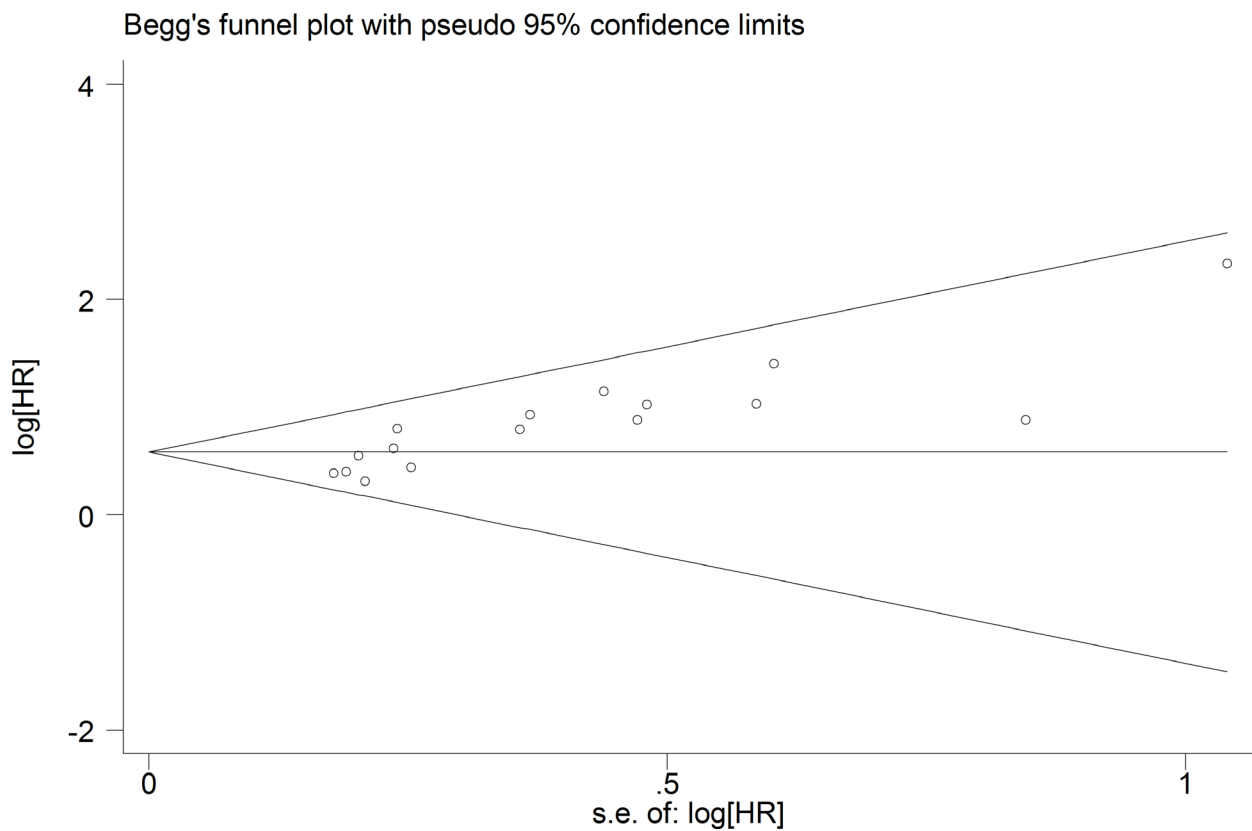

Figure 5: Funnel plots of publication biases on the relationships between B7-H4 expression and overall survival in solid cancer patients.

**Table 3: Pooled hazard ratios for DFS according to patients' ethnicity**

| Outcome subgroup | No. of patients | No. of studies | Random-effects model |         |             | Heterogeneity |       |
|------------------|-----------------|----------------|----------------------|---------|-------------|---------------|-------|
|                  |                 |                | HR (95% CI)          | P value | $P_D$ value | $I^2$ (%)     | P     |
| Overall survival | 1368            | 5              | 2.12(1.45,3.09)      | <0.001  |             | 56.9          | 0.055 |
| Ethnicity        |                 |                |                      |         | 0.038       |               |       |
| Asian            | 545             | 4              | 2.44(1.64,3.65)      | <0.001  |             | 39.8          | 0.173 |
| Caucasian        | 823             | 1              | 1.38(0.94,2.02)      | 0.099   |             | -             | -     |
| Tumor type       |                 |                |                      |         | 0.055       |               |       |
| RCC              | 102             | 1              | 5.99(2.24,16.06)     | <0.001  |             | -             | -     |
| colorectal       | 185             | 1              | 1.83(1.20,2.82)      | 0.006   |             | -             | -     |
| gastric          | 156             | 1              | 2.25(1.51,3.34)      | <0.001  |             | -             | -     |
| prostate         | 823             | 1              | 1.38(0.94,2.02)      | 0.099   |             | -             | -     |
| cervical         | 102             | 1              | 3.19(0.90,11.25)     | 0.071   |             | -             | -     |

DFS = disease-free survival; HR = hazard ratio; CI = confidence interval;  $P_D$  = P for subgroup difference.

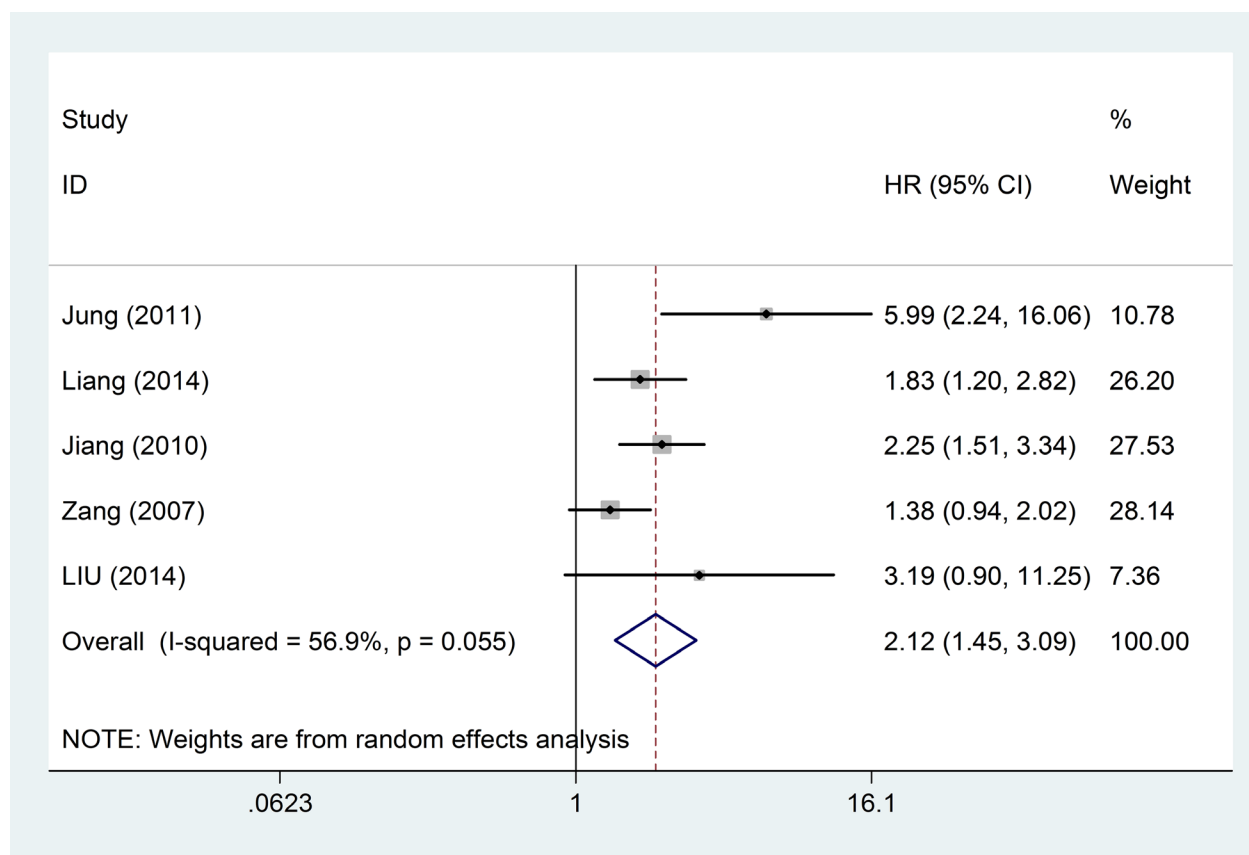

**Figure 6: Forest plots of studies evaluating hazard ratios of high B7-H4 expression in solid cancers for disease-free survival.**



Our results clearly suggest that B7-H4 information could be used to substantially improve prognosis estimation and treatment decision-making of solid tumors. Considering the limitation of present analysis, this conclusion should be regarded cautiously. Further prospective multicentre studies designed adequately with larger sample size are needed to confirm the prognosis value of B7-H4 in cancer patients, as well as to explore more effective therapy strategies.

## MATERIALS AND METHODS

This meta-analysis was carried out in accordance with the Systematic Reviews and Meta-Analyses (PRISMA) guidelines.

### Search strategy

Literatures were searched through PubMed, Embase and the Cochrane Library (last update by November 26, 2015). Keywords used in the search strategy were “B7-H4 OR B7x OR B7S1” (all fields) AND “tumor OR tumour OR neoplasm OR cancer OR carcinoma” (all fields) AND “prognosis OR prognostic OR survival OR outcome” (all fields). We did not impose any advanced limitations when searching the databases. The reference lists of identified articles were also screened to further identify potential studies. The comprehensive database search was carried out independently by two authors (X. Song and Y. Shao).

### Inclusion and exclusion criteria

Literatures that were eligible for inclusion in this meta-analysis met the following criteria: (1) the expression of B7-H4 in cancer tissue; (2) investigation of the relationship between B7-H4 expression level and survival outcome; (3) provided sufficient data to estimate the hazard ratio (HR) and 95% confidence intervals (CI). Considering the tumorigenesis and metastasis mechanism of hematological malignancy is different from other tumors of epithelial origin, studies of hematological malignancy were excluded. When multiple studies reported on the same patient cohort, only the most recent or complete study was selected. Case reports, letters, reviews, conference abstracts and animal trials were excluded. Two reviewers independently evaluated titles and abstracts of the identified articles and subsequently excluded those that were considered irrelevant. The full text of enrolled articles was carefully examined for comprehensive evaluation. Disagreement from two reviews was resolved by consensus.

### Data extraction and quality assessment

The required information from all eligible studies was collected by two researchers independently, which

included first author's surname, publication year, origin of population, tumor type, sample number, tumor stage, lymph node metastasis, follow-up period, detected source, detected methods, the cut-off value, and HR as well as corresponding 95% CI. If a study reported both the results of univariate and multivariate analysis, only the latter was selected because it has increased precision due to accounting for confounding factors.

The quality of each study was assessed independently by two researchers according to the NOS [39]. For quality assessment, scores ranged from 0 (lowest) to 9 (highest), and studies with scores of 6 or more were rated as high quality.

### Statistical analysis

High and low expression of B7-H4 was defined according to the cut-off values provided in the articles. HRs and their 95% CIs were combined to measure the effective value of elevated B7-H4 expression on prognosis. If the statistical variables were described in the study, we extracted them directly. Otherwise, they were calculated from available numerical data in the articles according to the methods described by Tierney [40]. The data from Kaplan-Meier survival curves were read by Engauge Digitizer version 4.1, and three independent researchers read the curves to reduce reading variability. We also sent e-mail to the corresponding authors of eligible articles requesting additional information and original data needed for the meta-analysis. An observed HR greater than 1 indicated a worse prognosis in patients with B7-H4 overexpression and HR less than 1 suggested a better prognosis. Statistical heterogeneity was assessed by visual inspection of forest plots, by performing the Chi-square test (assessing the *P* value), and by calculating the *I*<sup>2</sup> statistic [41, 42]. If the *P* value was less than 0.05 and/or *I*<sup>2</sup> exceeded 50%, indicating the presence of heterogeneity, a random-effects model (the DerSimonian-Laird method) was used. Otherwise, the fixed-effects model (the Mante-Haenszel method) was used. Subgroup analysis and meta-regression were further performed to explore the source of identified heterogeneity. Publication bias was estimated by visually assessing the asymmetry of an inverted funnel plot. Furthermore, Begg's and Egger's tests were performed to provide quantitative evidence of publication bias. If publication bias was observed, we adjusted for the effect by the use of the Duval and Tweedie trim-and-fill method [43]. For all analyses, STATA version 12.0 (Stata Corporation, College Station, TX, USA) was used with significance defined as a *P*-value of less than 0.05 except where otherwise specified.

## ACKNOWLEDGMENTS

This research project was supported by the General Program of Jiangsu Province Department of Health (H201350).

## CONFLICTS OF INTEREST

The authors declare that they have no conflicts of interest concerning this article.

## REFERENCES

1. Torre LA, Bray F, Siegel RL, Ferlay J, Lortet-Tieulent J, Jemal A. Global cancer statistics, 2012. *CA Cancer J Clin*. 2015; 65:87-108.
2. Greaves P, Gribben JG. The role of B7 family molecules in hematologic malignancy. *Blood*. 2013; 121:734-744.
3. Mahoney KM, Rennert PD, Freeman GJ. Combination cancer immunotherapy and new immunomodulatory targets. *Nature reviews Drug discovery*. 2015; 14:561-584.
4. Jeon H, Vigdorovich V, Garrett-Thomson SC, Janakiram M, Ramagopal UA, Abadi YM, Lee JS, Scanduzzi L, Ohaegbulam KC, Chinai JM, Zhao R, Yao Y, Mao Y, Sparano JA, Almo SC, Zang X. Structure and cancer immunotherapy of the B7 family member B7x. *Cell reports*. 2014; 9:1089-1098.
5. Simon I, Zhuo S, Corral L, Diamandis EP, Sarno MJ, Wolfert RL, Kim NW. B7-h4 is a novel membrane-bound protein and a candidate serum and tissue biomarker for ovarian cancer. *Cancer research*. 2006; 66:1570-1575.
6. Tringler B, Zhuo S, Pilkington G, Torkko KC, Singh M, Lucia MS, Heinz DE, Papkoff J, Shroyer KR. B7-h4 is highly expressed in ductal and lobular breast cancer. *Clinical cancer research*. 2005; 11:1842-1848.
7. Sun Y, Wang Y, Zhao J, Gu M, Giscombe R, Lefvert AK, Wang X. B7-H3 and B7-H4 expression in non-small-cell lung cancer. *Lung cancer*. 2006; 53:143-151.
8. Wang S, Chen L. Co-signaling molecules of the B7-CD28 family in positive and negative regulation of T lymphocyte responses. *Microbes and infection*. 2004; 6:759-766.
9. Zhang L, Wu H, Lu D, Li G, Sun C, Song H, Li J, Zhai T, Huang L, Hou C, Wang W, Zhou B, Chen S, Lu B, Zhang X. The costimulatory molecule B7-H4 promote tumor progression and cell proliferation through translocating into nucleus. *Oncogene*. 2013; 32:5347-5358.
10. He C, Qiao H, Jiang H, Sun X. The inhibitory role of b7-h4 in antitumor immunity: association with cancer progression and survival. *Clinical & developmental immunology*. 2011; 2011:695834.
11. Liu W, Shibata K, Koya Y, Kajiyama H, Senga T, Yamashita M, Kikkawa F. B7-H4 overexpression correlates with a poor prognosis for cervical cancer patients. *Mol Clin Oncol*. 2014; 2:219-225.
12. Liang M, Li J, Wang D, Li S, Sun Y, Sun T, Zhang J, Chen X, Li Q, Sun S. T-cell infiltration and expressions of T lymphocyte co-inhibitory B7-H1 and B7-H4 molecules among colorectal cancer patients in northeast China's Heilongjiang province. *Tumour biology*. 2014; 35:55-60.
13. Jiang J, Zhu Y, Wu C, Shen Y, Wei W, Chen L, Zheng X, Sun J, Lu B, Zhang X. Tumor expression of B7-H4 predicts poor survival of patients suffering from gastric cancer. *Cancer immunology, immunotherapy*. 2010; 59:1707-1714.
14. Simon I, Katsaros D, Rigault de la Longrais I, Massobrio M, Scorilas A, Kim NW, Sarno MJ, Wolfert RL, Diamandis EP. B7-H4 is over-expressed in early-stage ovarian cancer and is independent of CA125 expression. *Gynecologic oncology*. 2007; 106:334-341.
15. Arigami T, Uenosono Y, Ishigami S, Hagihara T, Haraguchi N, Natsugoe S. Clinical significance of the B7-H4 coregulatory molecule as a novel prognostic marker in gastric cancer. *World journal of surgery*. 2011; 35:2051-2057.
16. Chen LJ, Sun J, Wu HY, Zhou SM, Tan Y, Tan M, Shan BE, Lu BF, Zhang XG. B7-H4 expression associates with cancer progression and predicts patient's survival in human esophageal squamous cell carcinoma. *Cancer immunology, immunotherapy*. 2011; 60:1047-1055.
17. Jung SG, Choi KU, Lee SD, Lee ZZ, Chung MK. The Relationship between B7-H4 Expression and Clinicopathological Characteristics in Clinical Stage T1 Conventional Renal Cell Carcinoma. *Korean journal of urology*. 2011; 52:90-95.
18. Quandt D, Fiedler E, Boettcher D, Marsch W, Seliger B. B7-h4 expression in human melanoma: its association with patients' survival and antitumor immune response. *Clinical cancer research*. 2011; 17:3100-3111.
19. Li ZY, Zhang XH, Chen Y, Guo JG, Sai K, Yang QY, Chen ZP, Mou YG. Clinical significance of B7-H4 expression in matched non-small cell lung cancer brain metastases and primary tumors. *OncoTargets and therapy*. 2013; 6:869-875.
20. Tsiaousidou A, Lambropoulou M, Chatzitheoklitos E, Tripsianis G, Tsompanidou C, Simopoulos C, Tsaroucha AK. B7H4, HSP27 and DJ-1 molecular markers as prognostic factors in pancreatic cancer. *Pancreatology*. 2013; 13:564-569.
21. Zhu J, Chu B-F, Yang Y-P, Zhang S-L, Zhuang M, Lu W-J, Liu Y-B. B7-H4 Expression is Associated with Cancer Progression and Predicts Patient Survival in Human Thyroid Cancer. *Asian Pacific Journal of Cancer Prevention*. 2013; 14:3011-3015.
22. Chen Y, Sun J, Zhao H, Zhu D, Zhi Q, Song S, Zhang L, He S, Kuang Y, Zhang Z, Li D. The coexpression and clinical significance of costimulatory molecules B7-H1, B7-H3, and B7-H4 in human pancreatic cancer. *OncoTargets and therapy*. 2014; 7:1465-1472.
23. Fan M, Zhuang Q, Chen Y, Ding T, Yao H, Chen L, He X, Xu X. B7-H4 expression is correlated with tumor progression and clinical outcome in urothelial cell carcinoma. *International journal of clinical and experimental pathology*. 2014; 7:6768-6775.
24. Maskey N, Li K, Hu M, Xu Z, Peng C, Yu F, Cao H, Chen J, Li Y, Yang G. Impact of neoadjuvant chemotherapy on

- lymphocytes and co-inhibitory B7-H4 molecule in gastric cancer: low B7-H4 expression associates with favorable prognosis. *Tumour biology*. 2014; 35:11837-11843.
25. Dong Q, Ma X. B7-H4 expression is associated with tumor progression and prognosis in patients with osteosarcoma. *BioMed research international*. 2015; 2015:156432.
  26. Geng Y, Wang H, Lu C, Li Q, Xu B, Jiang J, Wu C. Expression of costimulatory molecules B7-H1, B7-H4 and Foxp3<sup>+</sup> Tregs in gastric cancer and its clinical significance. *International journal of clinical oncology*. 2015; 20:273-281.
  27. Wang L, Cao NN, Wang S, Man HW, Li PF, Shan BE. Roles of coinhibitory molecules B7-H3 and B7-H4 in esophageal squamous cell carcinoma. *Tumour biology*. 2015.
  28. Zang X, Thompson RH, Al-Ahmadie HA, Serio AM, Reuter VE, Eastham JA, Scardino PT, Sharma P, Allison JP. B7-H3 and B7x are highly expressed in human prostate cancer and associated with disease spread and poor outcome. *Proceedings of the National Academy of Sciences of the United States of America*. 2007; 104:19458-19463.
  29. Prasad DV, Richards S, Mai XM, Dong C. B7S1, a novel B7 family member that negatively regulates T cell activation. *Immunity*. 2003; 18:863-873.
  30. Kristensen NN, Schmidt EG, Rasmussen S, Balk-Moller E, Claesson MH. B7-H4-Ig treatment of normal mice changes lymphocyte homeostasis and increases the potential of regulatory T cells. *Immunopharmacology and immunotoxicology*. 2013; 35:505-513.
  31. Kryczek I, Zou L, Rodriguez P, Zhu G, Wei S, Mottram P, Brumlik M, Cheng P, Curiel T, Myers L, Lackner A, Alvarez X, Ochoa A, Chen L, Zou W. B7-H4 expression identifies a novel suppressive macrophage population in human ovarian carcinoma. *The Journal of experimental medicine*. 2006; 203:871-881.
  32. Sica GL, Choi IH, Zhu G, Tamada K, Wang SD, Tamura H, Chapoval AI, Flies DB, Bajorath J, Chen L. B7-H4, a molecule of the B7 family, negatively regulates T cell immunity. *Immunity*. 2003; 18:849-861.
  33. Brahmer JR, Tykodi SS, Chow LQ, Hwu WJ, Topalian SL, Hwu P, Drake CG, Camacho LH, Kauh J, Odunsi K, Pitot HC, Hamid O, Bhatia S, Martins R, Eaton K, Chen S, et al. Safety and activity of anti-PD-L1 antibody in patients with advanced cancer. *The New England journal of medicine*. 2012; 366:2455-2465.
  34. Choi IH, Zhu G, Sica GL, Strome SE, Cheville JC, Lau JS, Zhu Y, Flies DB, Tamada K, Chen L. Genomic organization and expression analysis of B7-H4, an immune inhibitory molecule of the B7 family. *Journal of immunology*. 2003; 171:4650-4654.
  35. Tringler B, Liu W, Corral L, Torkko KC, Enomoto T, Davidson S, Lucia MS, Heinz DE, Papkoff J, Shroyer KR. B7-H4 overexpression in ovarian tumors. *Gynecologic oncology*. 2006; 100:44-52.
  36. Krambeck AE, Thompson RH, Dong H, Lohse CM, Park ES, Kuntz SM, Leibovich BC, Blute ML, Cheville JC, Kwon ED. B7-H4 expression in renal cell carcinoma and tumor vasculature: associations with cancer progression and survival. *Proceedings of the National Academy of Sciences of the United States of America*. 2006; 103:10391-10396.
  37. Awadallah NS, Shroyer KR, Langer DA, Torkko KC, Chen YK, Bentz JS, Papkoff J, Liu W, Nash SR, Shah RJ. Detection of B7-H4 and p53 in pancreatic cancer: potential role as a cytological diagnostic adjunct. *Pancreas*. 2008; 36:200-206.
  38. Zang X, Loke P, Kim J, Murphy K, Waitz R, Allison JP. B7x: a widely expressed B7 family member that inhibits T cell activation. *Proceedings of the National Academy of Sciences of the United States of America*. 2003; 100:10388-10392.
  39. Stang A. Critical evaluation of the Newcastle-Ottawa scale for the assessment of the quality of nonrandomized studies in meta-analyses. *European journal of epidemiology*. 2010; 25:603-605.
  40. Tierney JF, Stewart LA, Ghersi D, Burdett S, Sydes MR. Response to: Practical methods for incorporating summary time-to-event data into meta. Authors' reply. *Trials*. 2013; 14:391.
  41. Higgins JP, Thompson SG. Quantifying heterogeneity in a meta-analysis. *Statistics in medicine*. 2002; 21:1539-1558.
  42. Higgins JP, Thompson SG, Deeks JJ, Altman DG. Measuring inconsistency in meta-analyses. *Bmj*. 2003; 327:557-560.
  43. Duval S, Tweedie R. Trim and fill: A simple funnel-plot-based method of testing and adjusting for publication bias in meta-analysis. *Biometrics*. 2000; 56:455-463.
